# Supplementary material for: Schottky contact of an artificial polymer semiconductor composed of poly(dimethylsiloxane) and multiwall carbon nanotubes
Source: Royal Society of Chemistry journal article supplement (doi:10.1039/c5ta04907e), 2015-01-01
Supplement: c5ta04907e1.pdf [file c5ta04907e1.pdf]

## Supplementary information for

# Schottky Contact of Artificial Polymer Semiconductor Composed of Poly(dimethylsiloxane) and Multiwall Carbon Nanotube

Yi Zhou, Changhong Liu\*, and Shoushan Fan

Tsinghua-Foxconn Nanotechnology Research Center and Department of Physics, Tsinghua University, Beijing 100084, People's Republic of China.

E-mail: [chliu@mail.tsinghua.edu.cn](mailto:chliu@mail.tsinghua.edu.cn)

### 1. A comparison of Schottky barrier heights of this work with some previous results

**Table S1** Schottky barrier heights of Al/composite junctions

| Metal | Composite Semiconductor                                     | SBH (eV) | Ref.      |
|-------|-------------------------------------------------------------|----------|-----------|
| Al    | SWNT-Poly(ethylene glycol dimethacrylate-n-vinyl imidazole) | 0.61     | S1        |
| Al    | FWNT-PEDOT                                                  | 0.72     | S2        |
| Al    | MWNT-PDMS                                                   | 0.95     | This work |

#### References:

S1. M. A. Afrailov, A. Kara, N. Tekin, S. Beyaz and H. Köçkar, *Thin Solid Films*, 2012, **520**, 2106-2109.

S2. B. Gupta, M. Mehta, A. Melvin, R. Kamalakannan, S. Dash, M. Kamruddin and A. K. Tyagi, *Mater. Chem. Phys.*, 2014, **147**, 867-877.
